# Supplementary material for: Surface-enhanced Raman spectroscopy for characterization of filtrates of blood serum samples from patients with tuberculosis obtained by 50 kDa filtration devices
Source: Royal Society of Chemistry journal article supplement (doi:10.1039/d4ra00420e), 2024-01-01
Supplement: d4ra00420e1.pdf [file d4ra00420e1.pdf]

### Supplementary material

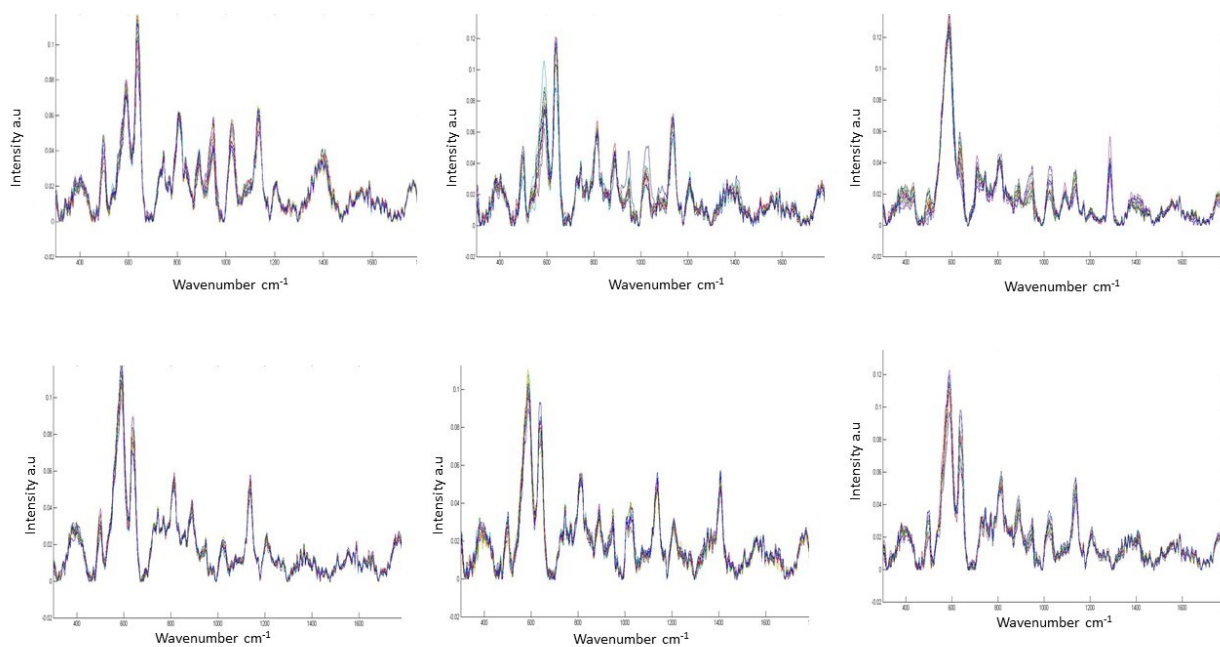

Disease samples

**Fig. S1:** Original SERS spectra of some diseased samples

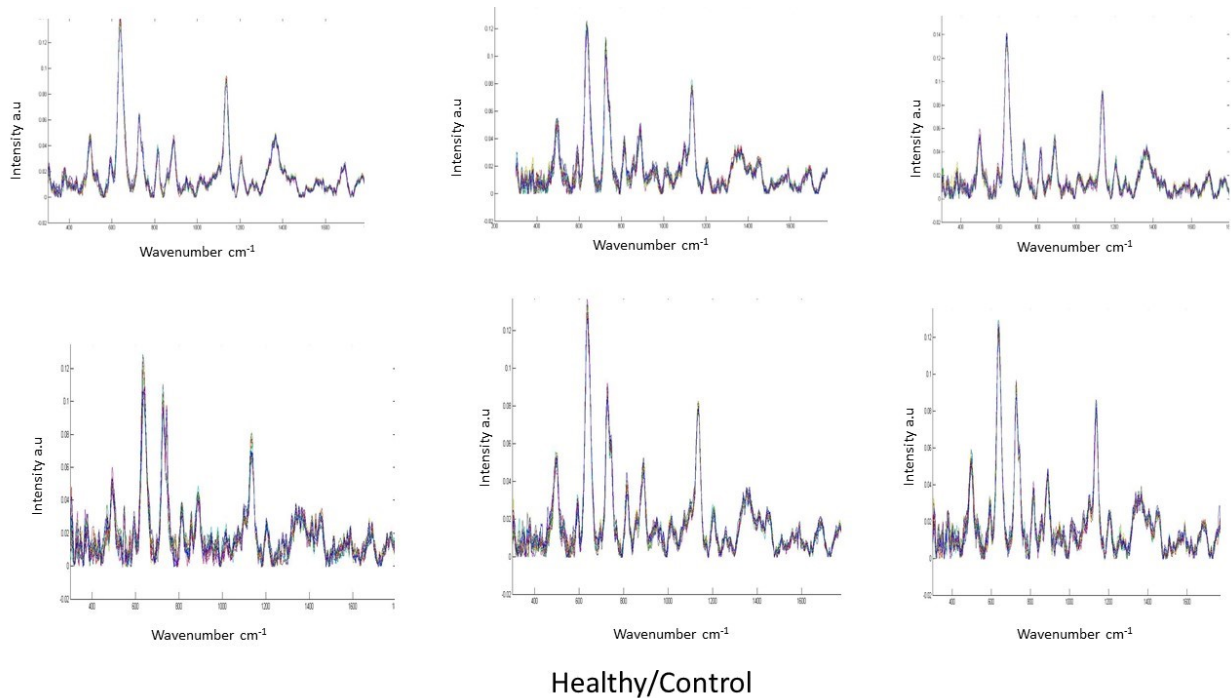

**Fig. S2:** Original SERS spectra of healthy/control samples.

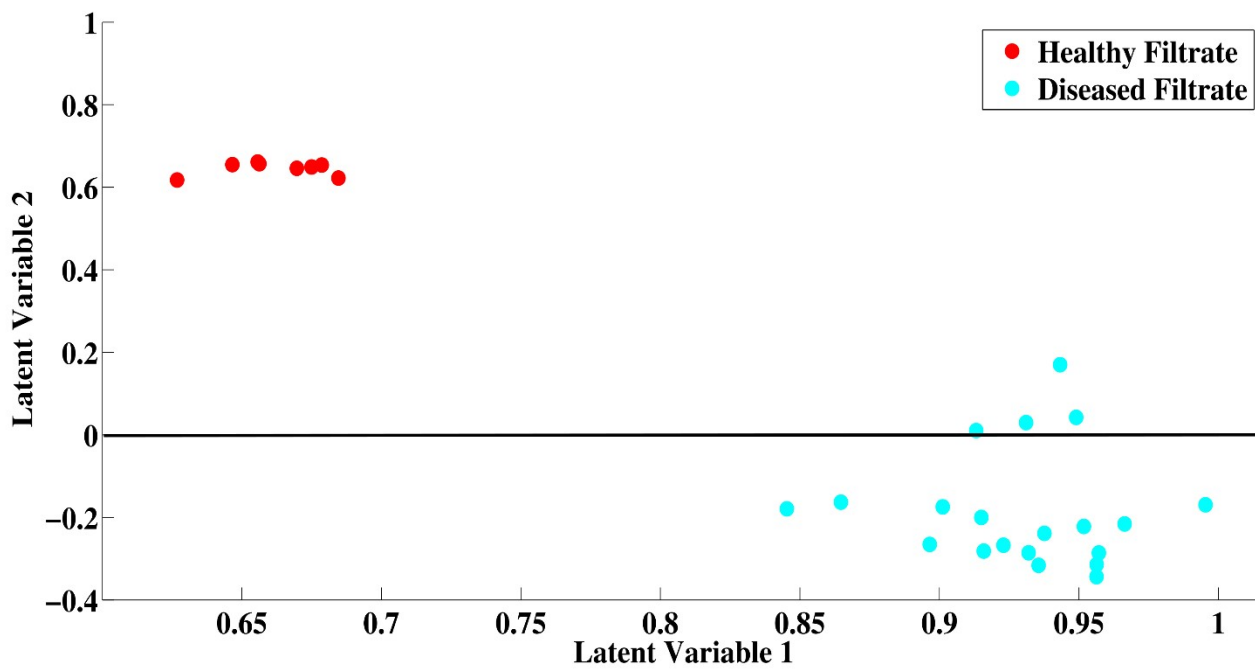

**Fig. S3:** PLS-DA scatter score plot of 60 samples (by averaging 10 spectra for each sample: 1 spectrum = 1 sample) where one dot representing one sample.
